P1245 **AORTIC ARCH CALCIFICATION AND PROGNOSIS IN HEMODIALYSIS PATIENTS**

Toyohiro Hashiba<sup>1</sup>, Tomoko Honda<sup>1</sup>, Satoru Kishi<sup>1</sup>, Yuto Takenaka<sup>1</sup>, Satoshi Furuse<sup>1</sup>, Kyosuke Nishio<sup>2</sup>, Kazunobu Masaki<sup>2</sup>, Tatsuya Kano<sup>3</sup>, Naobumi Mise<sup>1</sup>

<sup>1</sup>Mitsui Memorial Hospital, Internal Medicine, Chiyoda City, Japan, <sup>2</sup>Shinko Clinic, Internal Medicine, Katsushika City, Japan and <sup>3</sup>Shin-Koikwa Clinic Funabori, Internal Medicine, Edogawa City, Japan

**Background and Aims:** Aortic arch calcification (AAC) is associated with poor survival in dialysis patients, but long-term prognosis has not been examined well.

**Method:** In the present study, we investigated the prognostic impact of AAC among 321 chronic hemodialysis patients (211 males, 64±11 ages, dialysis history 10±8 years). ACC in chest X-ray was evaluated in 2012 and the patients were followed up for 7 years. The degree of AAC was classified into 4 categories as follows: Grade 0, no visible calcification; Grade 1, small spots of calcification or single thin calcification of the aortic knob; Grade 2, one or more areas of thick calcification; and Grade 3, circular calcification of the aortic knob.

**Results:** Calcification gravity was Grade 0 in 88 patients (27%), Grade 1 in 145 (45%), Grade 2 in 54 (17%) and Grade 3 in 34 (11%). All-cause mortality was significantly worse in patients with higher AAC grade (Grade 0: 19% (n=17), Grade 1: 35% (n=51), Grade 2: 46% (n=25), Grade 3: 71% (n=24); p < 0.0001). Univariate analysis showed AAC grade, age, cardiothoracic ratio, ischemic heart disease, cerebral vascular disease, albumin, hemoglobin, C-reactive protein and use of non-Ca phosphorus binders were significantly associated with all-cause mortality. In multivariate analysis, Grade 3 AAC, age and ischemic heart disease were independent risk factors for all-cause mortality. (Figure)

**Conclusion:** In our dialysis patients, higher gravity of AAC was independently associated with all-cause mortality. Gravity of AAC in chest X-ray is useful to predict prognosis of dialysis patients.

| Risk Factors<br>for all cause mortality | Univariate |           |           | Multivariate |           |          |
|-----------------------------------------|------------|-----------|-----------|--------------|-----------|----------|
|                                         | HR         | 95% CI    | P value   | HR           | 95% CI    | P value  |
| AAC Grade 1 vs. Grade 0                 | 1.98       | 1.17–3.52 | 0.01*     | 1.28         | 0.75–2.31 | 0.38     |
| Grade 2 vs. Grade 0                     | 2.78       | 1.51–5.24 | 0.001*    | 1.74         | 0.94–3.30 | 0.08     |
| Grade 3 vs. Grade 0                     | 5.72       | 3.08–10.9 | < 0.0001* | 2.83         | 1.43–5.73 | 0.003*   |
| Dialysis vintage (year)                 | 1.00       | 0.99–1.00 | 0.15      |              |           |          |
| Age (year)                              | 1.06       | 1.04–1.08 | < 0.0001* | 1.05         | 1.02–1.07 | < 0.001* |
| Male                                    | 0.73       | 0.51–1.07 | 0.10      |              |           |          |
| Diabetes                                | 1.28       | 0.88–1.83 | 0.19      |              |           |          |
| Hypertension                            | 1.14       | 0.79–1.65 | 0.50      |              |           |          |
| Cardiothoracic ratio (%)                | 1.06       | 1.03–1.10 | < 0.001*  | 1.02         | 0.98–1.06 | 0.28     |
| Hyperlipidemia                          | 0.91       | 0.61–1.33 | 0.62      |              |           |          |
| Ischemic Heart Disease                  | 1.79       | 1.18–2.66 | 0.007*    | 1.66         | 1.07–2.51 | 0.02*    |
| Cerebral Vascular Disease               | 1.81       | 1.23–2.64 | 0.002*    | 1.41         | 0.94–2.09 | 0.09     |
| Albumin (g/dL)                          | 0.18       | 0.10–0.34 | < 0.01*   | 0.65         | 0.31–1.36 | 0.25     |
| Hemoglobin (g/dL)                       | 0.77       | 0.62–0.94 | 0.01*     | 0.88         | 0.70–1.11 | 0.29     |
| C-reactive protein (mg/dL)              | 1.44       | 1.22–1.66 | < 0.01*   | 1.14         | 0.93–1.39 | 0.20     |
| Corrected Calcium (mg/dL)               | 0.99       | 0.70–1.41 | 0.97      |              |           |          |
| Use of CaCO <sub>3</sub>                | 0.88       | 0.76–1.01 | 0.08      |              |           |          |
| Use of Non-Ca Phosphorus binders        | 0.63       | 0.44–0.91 | 0.01*     | 1.06         | 0.70–1.61 | 0.78     |
| Use of Vit D                            | 0.99       | 0.68–1.44 | 0.97      |              |           |          |

Figure:
